# Supplementary material
Source: publisher site journal article supplement (https://www.degruyterbrill.com/publication/isbn/9783486711691/downloadAsset/9783486711691_Buchinformation.pdf)
Supplement: Supplementary file 1 [file 9783486711691_Buchinformation.pdf]

## Strukturierte Einführung in die wesentlichen Aspekte

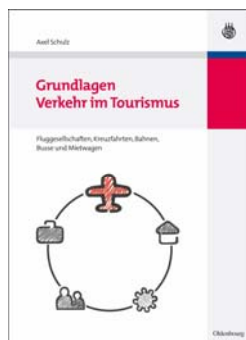

Axel Schulz

### Grundlagen Verkehr im Tourismus Fluggesellschaften, Kreuzfahrten, Bahnen, Busse und Mietwagen

VIII, 137 Seiten | Broschur | 19,80 €  
ISBN 978-3-486-59732-5

Verkehrsdienstleistungen sind wichtiger Bestandteil der touristischen Leistungskette und erfreuen sich kontinuierlich wachsender Markt- und Beförderungszahlen. Unternehmen wie der Frankfurter Flughafen oder die Deutsche Bahn gehören zu den größten Unternehmen und damit auch Arbeitgebern in Deutschland und leisten einen unverzichtbaren Beitrag für den Industriestandort Deutschland.

Das Werk "Grundlagen Verkehr im Tourismus" führt strukturiert in alle wesentlichen Aspekte des Luft-, Schiffs-, Bahn- und Straßenverkehr ein und stellt die wichtigsten operativen Bereiche und Managementaufgaben der Verkehrsbetriebe vor. In einem Werk werden der Verkehr in der Luft, auf der Straße, auf der Schiene und auf dem Wasser aus touristischer Perspektive behandelt wird.

---

Dieses Buch richtet sich an Studierende und Praktiker.

---

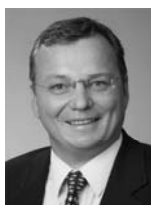

Prof. Dr. Axel Schulz lehrt Tourismus- und Informationsmanagement an der Hochschule Kempten.

[www.oldenbourg.de](http://www.oldenbourg.de)

**Pressereferat Wirtschafts- und Sozialwissenschaften**

Oldenbourg Wissenschaftsverlag | Rosenheimer Str. 145 | 81671 München  
Tel.: +49 89 45051-468 | Fax: +49 89 45051-292 | [presse-wiso@oldenbourg.de](mailto:presse-wiso@oldenbourg.de)

Alle Veröffentlichungen des Oldenbourg Verlags sind über den Buchhandel zu beziehen.

Rezensionsexemplare auf Anforderung.
